# Supplementary material for: Two proteases with caspase‐3‐like activity, cathepsin B and proteasome, antagonistically control ER‐stress‐induced programmed cell death in Arabidopsis
Source: PubMed Central journal article supplement (PMC5947621; doi:10.1111/nph.14676), 2017-07-04
Supplement: NPH-218-1143-s001.pdf [file NPH-218-1143-s001.pdf]

***New Phytologist* Supporting Information**

Article title: Two proteases with caspase 3-like activity, cathepsin B and proteasome, antagonistically control ER-stress-induced programmed cell death in *Arabidopsis*

Authors: Yao-Min CAI, Jia YU, Yuan GE, Aleksandr MIRONOV and Patrick GALLOIS

Article acceptance date: 24 May 2017

The following Supporting Information is available for this article:

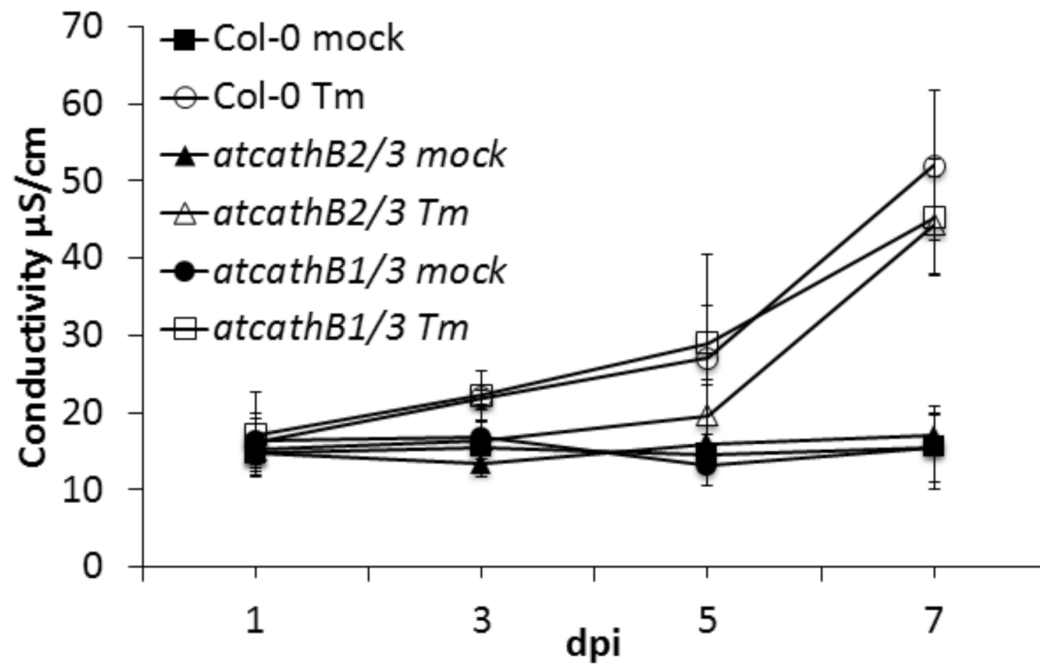

**Fig. S1** Ion leakages of cathepsin B double mutants in ER stress-induced PCD. Col-0 and cathepsin B double mutants (*atcathb2/3* and *atcathb1/3*) leaves were infiltrated with 15μg/mL tunicamycin (Tm) or a mock solution (M). For each replicate, the mean conductivity of three leaf discs was measured. Data was measured at one, three, five and seven days after infiltration. Error bar=95%CI for biological triplicates.

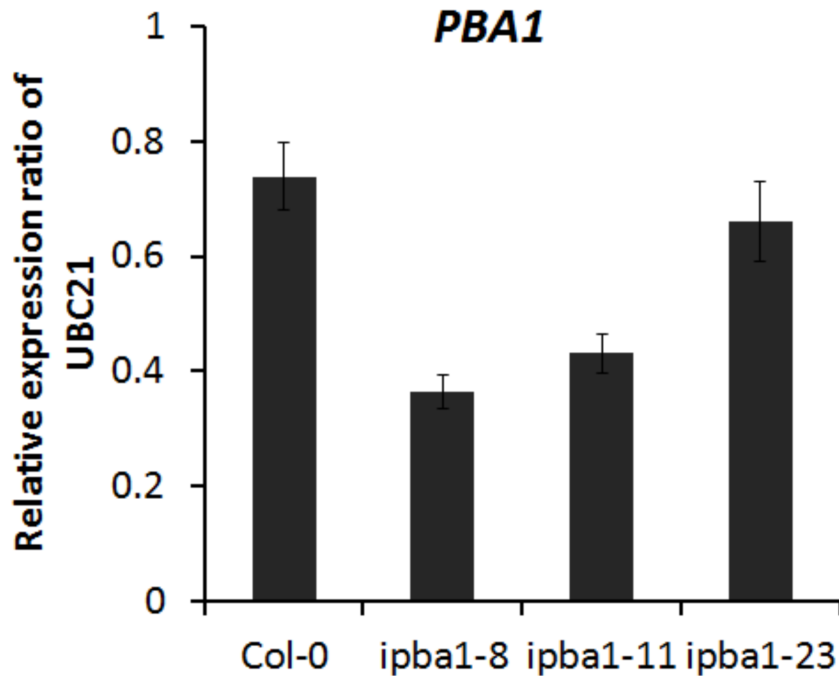

**Fig. S2** Down regulation of transcript levels for *PBA1* in *PBA1* RNAi *Arabidopsis* lines. Total RNA was extracted from 5-weeks-old leaves. The transcript level of *PBA1* in Col-0 and *PBA1* down-regulation lines (*ipba1-8*, *ipba1-11* and *ipba1-23*) leaves was measured by qRT-PCR using primers qPBA1-F and qPBA1-R (Table S1). Expression is represented relative to the transcript level of *UBC21* used as a reference gene. Error bar= 95%CI of biological triplicates. Hatsugai *et al.* (2009, fig 3G) has shown that these lines have the activity for their proteasome subunits PBA1, PBB and PBE reduced by 60 to 80%.

**Table S1.** Primer sequences and corresponding genes used for qRt-PCR experiments.

| Primer ID    | Gene         | AGI code  | Primer sequence            |
|--------------|--------------|-----------|----------------------------|
| pNAC089_326F | AtNAC089     | AT5G22290 | 5'-TTTCGAGCCTTGGGATTTAC    |
| pNAC089_455R | AtNAC089     | AT5G22290 | 5'-GCTCTTTCCCAGTTGCTTTC    |
| SYBR-Bip2-F  | Bip2         | AT5G42020 | 5'-TCAGCACCAAGTCCGTGTAG    |
| SYBR-Bip2-R  | Bip2         | AT5G42020 | 5'-CTTCACAGGTCCCATGGTCT    |
| SYBR-2300-F  | Cathepsin B1 | AT1G02300 | 5'-CCACGGTGTAGTAACCCAAGA   |
| SYBR-2300-R  | Cathepsin B1 | AT1G02300 | 5'-GTATGCGCCGACACCATAG     |
| SYBR-2305-F  | Cathepsin B2 | AT1G02305 | 5'-GTGTTAGCGGAAACCAGCTT    |
| SYBR-2305-R  | Cathepsin B2 | AT1G02305 | 5'-CAGTGAAGGCAACCTCAACA    |
| SYBR-1610-F  | Cathepsin B3 | AT4G01610 | 5'-GAAATGCGTTAGCGACAACA    |
| SYBR-1610-R  | Cathepsin B3 | AT4G01610 | 5'-CTGCCATGATATCTTGTGGATT  |
| qPBA1-F      | PBA1         | AT4G31300 | 5'-CATGCTCCAAACTGGTCTCA    |
| qPBA1-R      | PBA1         | AT4G31300 | 5'-CAAACGGTTGCTCGACTACA    |
| qPDI-F       | PDI6         | AT1G77510 | 5'-TGAGAAATGGAGGGAAGTCG    |
| qPDI-R       | PDI6         | AT1G77510 | 5'-CAACAACCTCAGTGGCAGAA    |
| qUBC21-409F  | UBC21/PEX4   | AT5G25760 | 5'-ACAGCGAGAGAAAGTAGCAGA   |
| qUBC21-489R  | UBC21/PEX4   | AT5G25760 | 5'-TTGATAAGAGCGGTCCATTTGAA |

**Reference:**

**Hatsugai N, Iwasaki S, Tamura K, Kondo M, Fuji K, Ogasawara K, Nishimura M, Hara-Nishimura I. 2009.** A novel membrane fusion-mediated plant immunity against bacterial pathogens. *Genes and Development* **23**: 2496–2506.
